# Supplementary material
Source: PubMed Central journal article supplement (PMC5523940)

**Supplemental Table I. Definitions of coronary heart disease across studies.**

| <b>Study</b>           | <b>CHD Cases</b> | <b>Controls</b> | <b>CHD Definition</b>                                                                                                                                                                                                                                                                                                      | <b>Control Definition</b>                                                                                                                              |
|------------------------|------------------|-----------------|----------------------------------------------------------------------------------------------------------------------------------------------------------------------------------------------------------------------------------------------------------------------------------------------------------------------------|--------------------------------------------------------------------------------------------------------------------------------------------------------|
| <b>ATVB</b>            | 1763             | 1693            | EOMI in male or female $\leq 45y$                                                                                                                                                                                                                                                                                          | No history of thromboembolic disease                                                                                                                   |
| <b>BBJ</b>             | 9957             | 5641            | History of CHD validated by an evidence of left ventricular wall motion abnormalities on echocardiography and a coronary angiography.                                                                                                                                                                                      | Free of CHD individuals with 5 diseases (cerebral aneurysm, esophageal cancer, endometrial cancer, chronic obstructive pulmonary disease or glaucoma). |
| <b>CAGE-CAD Stage1</b> | 1291             | 1314            | The CHD criteria include (i) a validated history of either MI or coronary revascularization (coronary artery bypass grafting or percutaneous coronary intervention), or (ii) subjective symptoms of angina pectoris with 1 or more major coronary vessels showing $\geq 75\%$ stenosis documented by coronary angiography. | Free of CHD                                                                                                                                            |
| <b>CAGE-CAD Stage2</b> | 3038             | 6320            |                                                                                                                                                                                                                                                                                                                            |                                                                                                                                                        |
| <b>DiscovEHR</b>       | 4199             | 19939           | EOCAD in male $\leq 55y$ or female $\leq 65y$                                                                                                                                                                                                                                                                              | Free of CAD                                                                                                                                            |
| <b>DHM</b>             | 400              | 399             | EOMI in male $\leq 40y$ or female $\leq 55y$                                                                                                                                                                                                                                                                               | Controls without CAD, men $\geq 65y$ and women $\geq 75y$                                                                                              |
| <b>ESP-EOMI</b>        | 962              | 1426            | EOMI (male $\leq 50y$ or female $\leq 60y$ )                                                                                                                                                                                                                                                                               | Hospital-based, no report of MI by history                                                                                                             |
| <b>JHS</b>             | 20               | 900             | Combination of prevalent CHD (self-reported or electrocardiographic evidence of MI) and incident CHD (MI or coronary revascularization) in $\leq 50y$ or female $\leq 60y$ .                                                                                                                                               | Free of CHD during follow-up                                                                                                                           |
| <b>Leicester</b>       | 1148             | 1058            | EOMI (male $\leq 50y$ or female $\leq 60y$ )                                                                                                                                                                                                                                                                               |                                                                                                                                                        |
| <b>Lubeck</b>          | 857              | 871             | EOMI (male $\leq 50y$ or female $\leq 60y$ )                                                                                                                                                                                                                                                                               | Controls without CAD; male and female $\leq$ age 65                                                                                                    |
| <b>OHS</b>             | 593              | 966             | EOMI (male $\leq 50y$ female $\leq 60y$ )                                                                                                                                                                                                                                                                                  | Asymptomatic                                                                                                                                           |
| <b>PROCARDIS</b>       | 912              | 904             | EOMI (male $\leq 50y$ or female $\leq 60y$ )                                                                                                                                                                                                                                                                               | No history of CAD                                                                                                                                      |
| <b>PROMIS</b>          | 3946             | 5671            | EOMI (male $\leq 50y$ or female $\leq 60y$ )                                                                                                                                                                                                                                                                               | Age and gender frequency-matched. No history of MI/CVD                                                                                                 |
| <b>REGICOR</b>         | 382              | 402             | EOMI (male $\leq 50y$ or female $\leq 60y$ )                                                                                                                                                                                                                                                                               | Controls from a population-based study; free of MI, coronary revascularization; $\geq 55$ and $< 80y$                                                  |
| <b>TAICHI</b>          | 3635             | 5423            | CAD (history of MI/CABG/PCI, or at least 1 major vessel with stenosis $\geq 50\%$ )                                                                                                                                                                                                                                        | Free of CAD                                                                                                                                            |

Abbreviations: CAD, coronary artery disease; CHD, coronary heart disease; CABG, Coronary artery bypass grafting; CVD, cardiovascular disease; EOCAD, early-onset coronary artery disease; EOMI, early-onset myocardial infarction; MI, myocardial infarction.

**Supplemental Table II. Baseline characteristics of MIGen, DiscovEHR, BBJ, CAGE-CAD, and TAICHI.**

|                                       | <b>MIGen</b>      | <b>DiscovEHR</b>  | <b>TAICHI</b>    | <b>BBJ</b>        | <b>CAGE-CAD<br/>Stage 1</b> | <b>CAGE-CAD<br/>Stage 2</b> |
|---------------------------------------|-------------------|-------------------|------------------|-------------------|-----------------------------|-----------------------------|
|                                       | <b>N = 25,273</b> | <b>N = 24,138</b> | <b>N = 9,058</b> | <b>N = 15,598</b> | <b>N = 2,605</b>            | <b>N = 9,358</b>            |
| Age, years, mean (SD)                 | 53.3 (13)         | 46.2 (12)         | 60.9 (15)        | 65.2 (10)         | 65.9 (8.4)                  | 62.5 (8.0)                  |
| Male gender, n (%)                    | 18,413 (73)       | 5,786 (24)        | 6,128 (68)       | 11,021 (71)       | 1,723 (66)                  | 6,089 (65)                  |
| BMI, kg/m <sup>2</sup> , median (IQR) | 26.2 (24–29)      | 31.2 (26–37)      | 24.9 (23–28)     | 23.4 (21–26)      | 23.3 (21–25)                | 23.2 (21–25)                |
| Current smoker, n (%)                 | 7,396 (29)        | 5051              | N/A              | 10,360 (66)       | 1,347 (51)                  | 4,788 (51)                  |
| <b>Ancestry</b>                       |                   |                   |                  |                   |                             |                             |
| African                               | 1,548 (6)         | 0 (0)             | 0 (0)            | 0 (0)             | 0 (0)                       | 0 (0)                       |
| European                              | 14,108 (56)       | 24,138 (100)      | 0 (0)            | 0 (0)             | 0 (0)                       | 0 (0)                       |
| South Asian                           | 9,617 (38)        | 0 (0)             | 0 (0)            | 0 (0)             | 0 (0)                       | 0 (0)                       |
| East Asian                            | 0 (0)             | 0 (0)             | 9,058 (100)      | 15,598 (100)      | 2,605 (100)                 | 9,358 (100)                 |
| <b>Medical history</b>                |                   |                   |                  |                   |                             |                             |
| Coronary heart disease, n (%)         | 10,983 (43)       | 4,199 (17)        | 3,635 (40)       | 9,957 (64)        | 1,291 (49)                  | 3038 (32)                   |
| Hypertension, n (%)                   | 9,511 (38)        | 12,940 (54)       | 4,789 (53)       | 6,462 (41)        | 1,188 (45)                  | 4799 (51)                   |
| Type 2 diabetes, n (%)                | 5,077 (20)        | 4,131 (17)        | 4,351 (48)       | 8,646 (55)        | 926 (35)                    | 2190 (23)                   |
| Lipid-lowering medication*, n (%)     | 3,683 (14)        | 6,133 (25)        | 1,784 (22)       | 5,207 (33)        | 383 (14)                    | N/A                         |
| <b>Lipid profile</b>                  |                   |                   |                  |                   |                             |                             |
| LDL cholesterol, mean (SD)            | 130 (48)          | 124 (38)          | 120 (50)         | 125 (38)          | 130 (38)                    | N/A                         |
| HDL cholesterol, mean (SD)            | 41 (14)           | 51 (15)           | 45 (14)          | 50 (15)           | 58 (16)                     | N/A                         |
| Triglycerides, median (IQR)           | 150 (102–222)     | 126 (89–177)      | 121 (83–176)     | 145 (86–175)      | 109 (79–154)                | N/A                         |
| Total cholesterol, mean (SD)          | 206 (54)          | 205 (42)          | 190 (53)         | 232 (61)          | 214 (41)                    | N/A                         |

\*At the time of lipid measurement.

Abbreviations: Same as Table 1.

**Supplemental Table III. Clinical characteristics of each study by case-control status.**

|                                       | MIGen         |              | DiscovEHR     |              | TAICHI       |              | BBJ          |              | CAGE-CAD Stage1 |              | CAGE-CAD Stage2 |              |
|---------------------------------------|---------------|--------------|---------------|--------------|--------------|--------------|--------------|--------------|-----------------|--------------|-----------------|--------------|
|                                       | CHD           | CHD-free     | CHD           | CHD-free     | CHD          | CHD-free     | CHD          | CHD-free     | CHD             | CHD-free     | CHD             | CHD-free     |
|                                       | Cases         | Controls     | Cases         | Controls     | Cases        | Controls     | Cases        | Controls     | Cases           | Controls     | Cases           | Controls     |
|                                       | N = 10,983    | N = 14,290   | N = 4,199     | N = 19,939   | N = 3,635    | N = 5,423    | N = 9,957    | N = 5,641    | N = 1,291       | N = 1,314    | N = 3,038       | N = 6,320    |
| Age, years, mean (SD)                 | 46.6 (8.5)    | 58.3 (13)    | 51.8 (7.3)    | 45.0 (12)    | 67.2 (11)    | 56.7 (16)    | 66.6 (10.4)  | 62.8 (9.8)   | 66.4 (9)        | 65.5 (7)     | 62.6 (9)        | 62.4 (6)     |
| Male gender, n (%)                    | 8,263 (75)    | 10,150 (71)  | 1,938 (46)    | 3,848 (19)   | 2,886 (79)   | 3,242 (60)   | 8,133 (82)   | 2,888 (51)   | 998 (77)        | 725 (55)     | 2364 (77)       | 3725 (58)    |
| BMI, kg/m <sup>2</sup> , median (IQR) | 26.7 (24–30)  | 25.9 (24–29) | 32.3 (28–38)  | 31.0 (26–37) | 25.5 (23–28) | 24.5 (22–27) | 24.0 (22–26) | 22.5 (20–25) | 23.5 (21–25)    | 23.1 (21–25) | 23.6 (21–25)    | 23.0 (21–24) |
| Current smoker, n (%)                 | 4,509 (41)    | 2,887 (20)   | 986 (23)      | 4,065 (20)   | N/A          | N/A          | 7,164 (72)   | 3,196 (57)   | 809 (62)        | 538 (40)     | 1999 (65)       | 2789 (44)    |
| <b>Medical history</b>                |               |              |               |              |              |              |              |              |                 |              |                 |              |
| Hypertension, n (%)                   | 4,331 (39)    | 5,180 (36)   | 3,373 (80)    | 12444 (34)   | 2,184 (60)   | 2,605 (48)   | 3,941 (40)   | 2,521 (45)   | 774 (59)        | 414 (31)     | 1635 (53)       | 3164 (50)    |
| Type 2 Diabetes, n (%)                | 2,679 (24)    | 2,398 (17)   | 1,520 (36)    | 2611 (13)    | 1,702 (47)   | 2,648 (49)   | 4,338 (44)   | 4,308 (76)   | 603 (46)        | 323 (24)     | 1153 (37)       | 1037 (16)    |
| Lipid-lowering medication*, n (%)     | 3,176 (29)    | 507 (4)      | 2,494 (59)    | 3639 (18)    | 1,226 (34)   | 738 (14)     | 4,712 (47)   | 495 (9)      | 171 (13)        | 212 (16)     | N/A             | N/A          |
| <b>Lipid profile</b>                  |               |              |               |              |              |              |              |              |                 |              |                 |              |
| LDL cholesterol, mean (SD)            | 146 (54)      | 120 (41)     | 130 (40)      | 122 (37)     | 124 (53)     | 117 (48)     | 126 (37)     | 124 (38)     | 124 (37)        | 132 (37)     | N/A             | N/A          |
| HDL cholesterol, mean (SD)            | 38 (13)       | 43 (15)      | 46 (13)       | 52 (15)      | 43 (12)      | 46 (15)      | 49 (14)      | 58 (18)      | 52 (15)         | 61 (16)      | N/A             | N/A          |
| Triglycerides, median (IQR)           | 168 (117–248) | 138 (94–206) | 154 (112–215) | 119 (85–167) | 124 (87–178) | 118 (81–174) | 150 (91–181) | 132 (77–158) | 133 (97–181)    | 103 (76–140) | N/A             | N/A          |
| Total cholesterol, mean (SD)          | 222 (57)      | 196 (48)     | 214 (43)      | 203 (42)     | 192 (52)     | 189 (53)     | 234 (62)     | 223 (58)     | 207 (41)        | 216 (41)     | N/A             | N/A          |

\*: At the time of lipid measurement.

Abbreviations: Same as Table 1.

**Supplemental Table IV. List of protein truncating variants in the *CETP* gene and coronary heart disease.**

| Chr | BP (b37) | REF   | ALT | rsID        | Consequence     | AA change  | MIGen         |               | DiscovEHR    |               | TAICHI       |              | BBJ          |              | CAGE-CAD-1   |              | CAGE-CAD-2   |              |
|-----|----------|-------|-----|-------------|-----------------|------------|---------------|---------------|--------------|---------------|--------------|--------------|--------------|--------------|--------------|--------------|--------------|--------------|
|     |          |       |     |             |                 |            | CHD           | Controls      | CHD          | Controls      | CHD          | Controls     | CHD          | Controls     | CHD          | Controls     | CHD          | Controls     |
|     |          |       |     |             |                 |            | N =<br>10,983 | N =<br>14,290 | N =<br>4,199 | N =<br>19,939 | N =<br>3,635 | N =<br>5,423 | N =<br>9,957 | N =<br>5,641 | N =<br>1,291 | N =<br>1,314 | N =<br>3,038 | N =<br>6,320 |
| 16  | 56995902 | CCA   | C   | rs766825140 | Frameshift      | T5SfsX95   | 0             | 1             | 0            | 0             | 0            | 0            | N/A          | N/A          | N/A          | N/A          | N/A          | N/A          |
| 16  | 56996963 | C     | T   | rs780627434 | Premature stop  | D54X       | 1             | 0             | 0            | 0             | 0            | 1            | N/A          | N/A          | N/A          | N/A          | N/A          | N/A          |
| 16  | 56996966 | GC    | G   | rs753876598 | Frameshift      | A55fsX     | 0             | 0             | 1            | 1             | 0            | 0            | N/A          | N/A          | N/A          | N/A          | N/A          | N/A          |
| 16  | 56997025 | T     | G   | rs201790757 | Premature stop  | Y74X       | 0             | 2             | 1            | 1             | 0            | 1            | N/A          | N/A          | N/A          | N/A          | N/A          | N/A          |
| 16  | 57003374 | C     | T   | rs759621654 | Premature stop  | Q104X      | 0             | 1             | 0            | 0             | 0            | 0            | N/A          | N/A          | N/A          | N/A          | N/A          | N/A          |
| 16  | 57003536 | C     | T   | rs781363517 | Premature stop  | Q128X      | 1             | 0             | 0            | 2             | 0            | 0            | N/A          | N/A          | N/A          | N/A          | N/A          | N/A          |
| 16  | 57003581 | AAC   | A   | .           | Frameshift      | Q145AfsX4  | 1             | 0             | 0            | 0             | 0            | 0            | N/A          | N/A          | N/A          | N/A          | N/A          | N/A          |
| 16  | 57003587 | C     | T   | .           | Premature stop  | Q145X      | 0             | 1             | 0            | 0             | 0            | 0            | N/A          | N/A          | N/A          | N/A          | N/A          | N/A          |
| 16  | 57003859 | CT    | C   | rs781445411 | Frameshift      | D159TfsX34 | 1             | 3             | 0            | 0             | 0            | 0            | N/A          | N/A          | N/A          | N/A          | N/A          | N/A          |
| 16  | 57003914 | G     | A   | .           | Splice donor    | INT5+1G>A  | 0             | 1             | 0            | 0             | 0            | 0            | N/A          | N/A          | N/A          | N/A          | N/A          | N/A          |
| 16  | 57004961 | C     | T   | rs142750310 | Premature stop  | Q182X      | 1             | 1             | 0            | 2             | 0            | 0            | N/A          | N/A          | N/A          | N/A          | N/A          | N/A          |
| 16  | 57005015 | G     | T   | rs777194816 | Splice donor    | INT6+1G>T  | 0             | 1             | 0            | 0             | 0            | 0            | N/A          | N/A          | N/A          | N/A          | N/A          | N/A          |
| 16  | 57005910 | TC    | T   | rs759929211 | Frameshift      | L223FfsX12 | 1             | 0             | 0            | 2             | 0            | 0            | N/A          | N/A          | N/A          | N/A          | N/A          | N/A          |
| 16  | 57007274 | ACCTC | A   | rs767971569 | Frameshift      | D261fsX    | 0             | 0             | 0            | 0             | 2            | 5            | N/A          | N/A          | N/A          | N/A          | N/A          | N/A          |
| 16  | 57007345 | C     | T   | rs748488549 | Premature stop  | R285X      | 0             | 3             | 0            | 2             | 0            | 0            | N/A          | N/A          | N/A          | N/A          | N/A          | N/A          |
| 16  | 57012122 | TC    | T   | rs769850349 | Frameshift      | P367fsX    | 0             | 0             | 0            | 0             | 2            | 7            | N/A          | N/A          | N/A          | N/A          | N/A          | N/A          |
| 16  | 57012151 | C     | CT  | .           | Frameshift      | A377fsX    | 0             | 0             | 1            | 0             | 0            | 0            | N/A          | N/A          | N/A          | N/A          | N/A          | N/A          |
| 16  | 57015573 | CTG   | C   | rs760384575 | Frameshift      | T410fsX    | 0             | 0             | 0            | 1             | 0            | 0            | N/A          | N/A          | N/A          | N/A          | N/A          | N/A          |
| 16  | 57016086 | G     | T   | .           | Premature stop  | E420X      | 0             | 0             | 0            | 1             | 0            | 0            | N/A          | N/A          | N/A          | N/A          | N/A          | N/A          |
| 16  | 57016107 | C     | T   | rs780936328 | Premature stop  | Q427X      | 1             | 0             | 0            | 0             | 0            | 0            | N/A          | N/A          | N/A          | N/A          | N/A          | N/A          |
| 16  | 57016150 | G     | A   | rs5742907   | Splice donor    | IVS14+1G>A | 1             | 0             | 0            | 1             | 0            | 0            | 72           | 50           | 6            | 15           | 17           | 59           |
| 16  | 57017236 | A     | G   | .           | Splice acceptor | IVS14-2A>G | 1             | 0             | 0            | 0             | 0            | 0            | N/A          | N/A          | N/A          | N/A          | N/A          | N/A          |
| 16  | 57017318 | C     | T   | rs577301331 | Premature stop  | R468X      | 2             | 1             | 0            | 0             | 0            | 0            | N/A          | N/A          | N/A          | N/A          | N/A          | N/A          |

Abbreviations: AA, amino acid; ALT, alternative allele; BP, base-pair position; CHD, coronary heart disease; Chr, chromosome; REF, reference allele.

Supplemental Figure. Meta-analysis evaluating effects of *CETP* protein truncating variant carrier status on lipid traits.

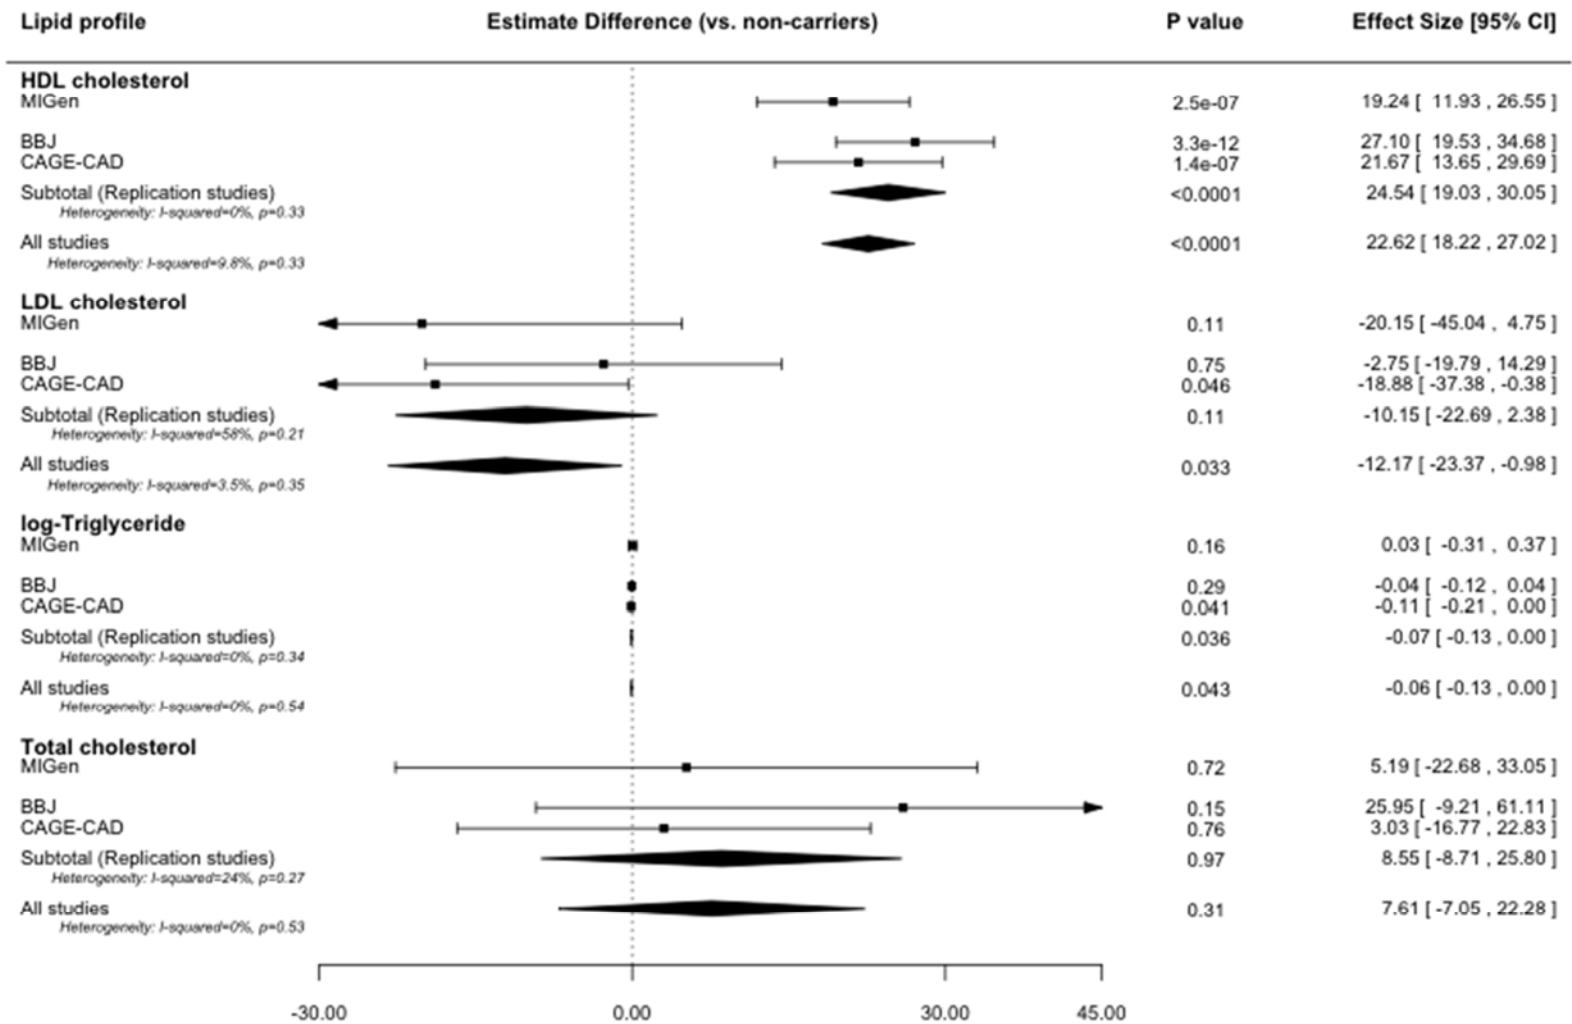

Supplement: NIHMS877011-supplement-311145_Onlne.pdf [file NIHMS877011-supplement-311145_Onlne.pdf]
