# Supplementary material
Source: PubMed Central journal article supplement (PMC5523940)
Supplement: NIHMS877011-supplement-311145_Author_Affiliations.pdf [file NIHMS877011-supplement-311145_Author_Affiliations.pdf]

## APPENDIX

### Protein Truncating Variants at the Cholesteryl Ester Transfer Protein Gene and Risk for Coronary Heart Disease: Authors and Affiliations

Akihiro Nomura<sup>2,3</sup>; Hong-Hee Won<sup>1,2,4</sup>; Amit V. Khera<sup>1,2</sup>; Fumihiko Takeuchi<sup>5</sup>; Kaoru Ito<sup>6</sup>; Shane McCarthy<sup>7</sup>; Connor A. Emdin<sup>1,2</sup>; Derek Klarin<sup>1,2</sup>; Pradeep Natarajan<sup>1,2</sup>; Seyedeh M. Zekavat<sup>2</sup>; Namrata Gupta<sup>2</sup>; Gina M. Peloso<sup>8</sup>; Ingrid B. Borecki<sup>7</sup>; Tanya M. Teslovich<sup>7</sup>; Rosanna Asselta<sup>9</sup>; Stefano Duga<sup>9</sup>; Piera A. Merlini<sup>10</sup>; Adolfo Correa<sup>11</sup>; Thorsten Kessler<sup>12,13</sup>; James G. Wilson<sup>14</sup>; Matthew J. Bown<sup>15</sup>; Alistair S. Hall<sup>16</sup>; Peter S. Braund<sup>15</sup>; David J. Carey<sup>17</sup>; Michael F. Murray<sup>17</sup>; H. Lester Kirchner<sup>17</sup>; Joseph B. Leader<sup>17</sup>; Daniel R. Lavage<sup>17</sup>; J. Neil Manus<sup>17</sup>; Dustin N. Hartze<sup>17</sup>; Nilesh J. Samani<sup>15</sup>; Heribert Schunkert<sup>12</sup>; Jaume Marrugat<sup>18</sup>; Roberto Elosua<sup>18</sup>; Ruth McPherson<sup>19</sup>; Martin Farrall<sup>20</sup>; Hugh Watkins<sup>20</sup>; DiscovEHR Study Group; Jyh-Ming J. Juang<sup>21</sup>; Chao A. Hsiung<sup>22</sup>; Shih-Yi<sup>23,24</sup>; Jun-Sing Wang<sup>23,25</sup>; TAICHI Consortium; Hayato Tada<sup>3</sup>; Masa-aki Kawashiri<sup>3</sup>; Akihiro Inazu<sup>3</sup>; Masakazu Yamagishi<sup>3</sup>; Tomohiro Katsuya<sup>26</sup>; Eitaro Nakashima<sup>27</sup>; Masahiro Nakatochi<sup>28</sup>; Ken Yamamoto<sup>29</sup>; Mitsuhiro Yokota<sup>30</sup>; Yukihide Momozawa<sup>6</sup>; Jerome I. Rotter<sup>31</sup>; Eric S. Lander<sup>2</sup>; Daniel J. Rader<sup>32</sup>; John Danesh<sup>33</sup>; Diego Ardissino<sup>34</sup>; Stacey Gabriel<sup>2</sup>; Cristen J. Willer<sup>35</sup>; Goncalo R. Abecasis<sup>36</sup>; Danish Saleheen<sup>37</sup>; Michiaki Kubo<sup>6</sup>; Norihiro Kato<sup>5</sup>; Yii-Der Ida Chen<sup>31</sup>; Frederick E. Dewey<sup>7</sup>; Sekar Kathiresan<sup>1,2</sup>

<sup>1</sup>Center for Genomic Medicine, Cardiovascular Research Center, Massachusetts General Hospital, Harvard Medical School, Boston, MA; <sup>2</sup>Program in Medical and Population Genetics, Broad Institute, Cambridge, MA; <sup>3</sup>Cardiovascular and Internal Medicine, Kanazawa University Graduate School of Medicine, Kanazawa, Ishikawa, Japan; <sup>4</sup>Samsung Advanced Institute for Health Sciences and Technology, Sungkyunkwan University, Samsung Medical Center, Seoul, Republic of Korea; <sup>5</sup>Gene Diagnostics and Therapeutics, Research Institute, National Center for Global Health and Medicine, Tokyo; <sup>6</sup>Center for Integrated Medical Sciences, RIKEN, Yokohama, Kanagawa, Japan; <sup>7</sup>Regeneron Genetics Center, Tarrytown, NY; <sup>8</sup>Biostatistics, Boston University School of Public Health, Boston, MA; <sup>9</sup>Biomedical Sciences, Humanitas University and Humanitas Clinical and Research Center, Milan, Italy; <sup>10</sup>Ospedale Niguarda, Milan; <sup>11</sup>Jackson Heart Study, Department of Medicine, University of Mississippi Medical Center, Jackson, MS; <sup>12</sup>Deutsches Herzzentrum München, Technische Universität München, Deutsches Zentrum für Herz-Kreislauf-Forschung, München; <sup>13</sup>Munich Heart Alliance, München; <sup>14</sup>Physiology and Biophysics, University of Mississippi Medical Center; <sup>15</sup>Departments of Cardiovascular Sciences and NIHR Leicester Cardiovascular Biomedical Research Unit, University of Leicester, Leicester, United Kingdom; <sup>16</sup>Leeds Institute of Cardiovascular and Metabolic Medicine, Leeds University, Leeds, United Kingdom; <sup>17</sup>Geisinger Health System, Danville, PA; <sup>18</sup>Cardiovascular Epidemiology and Genetics, IMIM (Hospital del Mar Research Institute), Barcelona, Spain; <sup>19</sup>University of Ottawa Heart Institute, Ottawa, Canada; <sup>20</sup>Cardiovascular Medicine, Radcliffe Department of Medicine and the Wellcome Trust Centre for Human Genetics, University of Oxford, Oxford, United Kingdom; <sup>21</sup>Cardiovascular Center and Division of Cardiology, Department of Internal Medicine, National Taiwan University Hospital, Taipei City, Taiwan; National Taiwan University College of Medicine, Taipei; <sup>22</sup>Institute of Population Health Sciences, National Health Research Institutes, Miaoli; <sup>23</sup>Endocrinology and Metabolism, Department of Internal Medicine, Taichung Veterans General Hospital, Taichung; <sup>24</sup>Center for Geriatrics and Gerontology; Taichung Veterans General Hospital, Taichung; <sup>25</sup>School of Medicine, National Yang-Ming University, Taipei; <sup>26</sup>Clinical Gene Therapy, Department of Geriatric Medicine and Nephrology, Osaka University Graduate School of Medicine, Suita; <sup>27</sup>Endocrinology and Diabetes, Department of Internal Medicine, Nagoya University Graduate School of Medicine, Department of Diabetes and Endocrinology, Chubu Rosai Hospital, Nagoya; <sup>28</sup>Center for Advanced Medicine and Clinical Research, Nagoya University Hospital, Nagoya; <sup>29</sup>Medical Chemistry, Kurume University School of Medicine, Kurume; <sup>30</sup>Genome Science, Aichi-Gakuin University School of Dentistry, Nagoya; <sup>31</sup>Institute for Translational Genomics and Population Sciences, Los Angeles BioMedical Research Institute and Departments of Medicine and

## APPENDIX

Pediatrics, Harbor-UCLA Medical Center, Torrance, CA; <sup>32</sup>Genetics, University of Pennsylvania, Philadelphia, PA; <sup>33</sup>Wellcome Trust Sanger Institute, Wellcome Trust Genome Campus, Hinxton, United Kingdom; Cambridge and National Institute for Health Research Blood and Transplant Research Unit in Donor Health and Genomics, Department of Public Health and Primary Care, University of Cambridge, Cambridge, United Kingdom; <sup>34</sup>Cardiology, Azienda Ospedaliero-Universitaria di Parma, University of Parma, Parma; ASTC: Associazione per lo Studio Della Trombosi in Cardiologia, Pavia; <sup>35</sup>Computational Medicine and Bioinformatics, Department of Human Genetics, and Department of Internal Medicine, University of Michigan, Ann Arbor, MI ; <sup>36</sup>Center for Statistical Genetics, Department of Biostatistics, University of Michigan School of Public Health, Ann Arbor, MI; <sup>37</sup>Biostatistics and Epidemiology, Perelman School of Medicine, University of Pennsylvania, Philadelphia, PA.
